# Supplementary material for: Regulation of inorganic carbon acquisition in a red tide alga ( Skeletonema costatum ): the importance of phosphorus availability
Source: Copernicus journal article supplement (doi:10.5194/bg-15-4871-2018), 2018-08-17
Supplement: Supplementary file 1 [file Supplement.xlsx]

## Sheet: Fig1
	Photosynthesis				Respiration				Ratio of respiration to photosynthesis
	12.6 uMCO2		2.8 uMCO2		12.6 uMCO2		2.8 uMCO2		12.6 uMCO2		2.8 uMCO2
P concentration	Mean	SD	Mean	SD	Mean	SD	Mean	SD	Mean	SD	Mean	SD
0.05	30.3567	3.30341	23.0233	1.76424	6.79667	0.74009	9.26333	0.97043	0.22674	0.04549	0.40464	0.06188
0.25	46.3833	3.07038	39.05	2.0818	11.66	0.97596	14.66	1.05	0.25178	0.02122	0.37709	0.04716
1	100.513	9.5874	73.8467	8.09001	23.6833	1.84362	23.7967	2.16084	0.23663	0.0234	0.32404	0.03719
4	103.463	8.43161	101.463	9.1925	24.5767	1.77015	23.9433	0.95102	0.23822	0.02027	0.23783	0.03087
10	102.277	7.40922	103.277	8.98535	25.34	1.84177	23.34	1.26574	0.24776	0.00294	0.22755	0.028

## Sheet: Fig2
	ETR
	12.6 uMCO2		2.8 uMCO2
P concentration	Mean	SD	Mean	SD
0.05	0.28152	0.03045	0.28612	0.03178
0.25	0.36938	0.02113	0.38778	0.0321
1	0.49128	0.03245	0.58788	0.04499
4	0.56304	0.02191	0.66424	0.03223
10	0.5865	0.03893	0.6923	0.04022

## Sheet: Fig3
	Chla
	12.6 uMCO2		2.8 uMCO2
P concentration	Mean	SD	Mean	SD
0.05	0.104	0.01179	0.10473	0.01318
0.25	0.13433	0.00971	0.1434	0.01271
1	0.15433	0.00862	0.18107	0.01044
4	0.185	0.00917	0.22527	0.01294
10	0.18467	0.0135	0.22387	0.00624

## Sheet: Fig4
	Photosynthesis(12.6 uMCO2)
P concentation	0.05		0.25		1		4		10
DIC	Mean	SD	Mean	SD	Mean	SD	Mean	SD	Mean	SD
0	0.97434	0.15654	2.59856	0.1258	5.4972	0.0491	8.3247	1.92306	8.8461	1.88636
0.1	5.1972	0.63916	8.70912	0.36694	13.7206	0.63274	19.2594	1.86375	20.0124	1.17901
0.2	9.14904	1.84981	17.86	1.38096	22.568	1.11778	31.8809	2.85226	32.4515	3.45881
0.5	12.0488	2.02832	20.995	1.87777	35.7665	1.13603	45.2707	2.88293	45.7542	3.19344
1	17.2489	2.33046	31.62	2.69547	55.9715	1.36451	67.4295	2.4833	68.5201	5.10326
2	28.7051	2.31605	52.8041	3.53266	72.7652	6.92448	95.4499	6.99616	94.4004	7.86576
4	32.4026	5.07236	56.2828	6.47615	79.9232	5.71473	96.9447	5.41065	95.9125	8.85086
	Photosynthesis (2.8 uMCO2)
P concentation	0.05		0.25		1		4		10
DIC	Mean	SD	Mean	SD	Mean	SD	Mean	SD	Mean	SD
0	2.17434	0.25654	4.72338	0.3258	8.4972	0.491	12.3247	1.92306	13.8461	1.88636
0.1	4.4965	0.79895	12.2472	1.20867	20.9008	0.79093	24.0743	2.32969	28.7655	1.47376
0.2	7.4363	2.31226	25.1156	1.4762	31.96	0.14722	39.8511	1.06532	40.5644	4.32351
0.5	12.2125	2.8976	33.742	1.25396	56.8093	1.6229	64.6724	4.11847	65.3632	4.56205
1	18.5612	2.91308	44.4657	3.36934	69.9644	1.70564	84.2869	3.10412	85.6501	6.37908
2	24.601	2.22697	57.1198	3.39679	79.5819	6.65815	95.6249	6.72708	92.6927	7.56323
4	27.0022	4.22697	58.0151	5.39679	79.1319	5.65815	93.9849	5.35708	90.9827	8.76323

## Sheet: Fig5
	Km
	12.6 uMCO2		2.8 uMCO2
P concentration	Mean	SD	Mean	SD
0.05	3.99982	0.30301	3.77872	0.43374
0.25	3.31419	0.13751	2.28062	0.25607
1	3.4843	0.24623	2.42448	0.23067
4	3.27442	0.31415	2.09602	0.17352
10	2.58873	0.28955	1.54077	0.07793

## Sheet: Fig6
	CA				Redox
	12.6 uMCO2		2.8 uMCO2		12.6 uMCO2		2.8 uMCO2
P concentration	Mean	SD	Mean	SD	Mean	SD	Mean	SD
0.05	0.04267	0.00351	0.043	0.003	39.77	4.11592	40.4218	3.04939
0.25	0.05267	0.00306	0.08633	0.01258	56.9567	7.96138	102.44	7.72582
1	0.09567	0.00351	0.235	0.00721	92.69	11.0208	211.807	8.84268
4	0.096	0.00458	0.35073	0.02679	94.58	8.14451	337.367	18.8285
10	0.09633	0.00551	0.353	0.03804	92.2633	6.84648	336.11	23.2917

## Sheet: Fig7
	pH(12.6 uMCO2)
P concentation	0.05		0.25		1		4		10
Time (h)	Mean	SD	Mean	SD	Mean	SD	Mean	SD	Mean	SD
0	8.2	0.01	8.2	0.01	8.2	0.01	8.2	0.01	8.2	0.01
1	8.32333	0.01528	8.33	0.01	8.34	0.01	8.33667	0.01528	8.34667	0.01528
2	8.54667	0.02082	8.56	0.01	8.56667	0.01528	8.57667	0.00577	8.58333	0.01528
3	8.74	0.02	8.83	0.01	8.86	0.01	9.03	0.02	9.03667	0.01155
4	8.85	0.05	8.95	0.04	9.01	0.01	9.13	0.03	9.15	0.03
5	8.94	0.03	9.03	0.02	9.1	0.01	9.23	0.03	9.25333	0.02517
6	8.96	0.03	9.06667	0.01528	9.14	0.01	9.28	0.03	9.31	0.03
7	8.99	0.03	9.08333	0.01528	9.15	0.01	9.3	0.01	9.32333	0.01528
8	9.03	0.03	9.1	0.01	9.17	0.01	9.32	0.01	9.34	0.03606
9	9.02	0.01	9.09	0.02	9.17	0.01	9.33	0.01	9.35	0.03606
10	9.02667	0.01528	9.09	0.02	9.17	0.02	9.33	0.01	9.35667	0.03512
	pH(2.8 uMCO2)
P concentation	0.05		0.25		1		4		10
Time (h)	Mean	SD	Mean	SD	Mean	SD	Mean	SD	Mean	SD
0	8.2	0.01	8.2	0.01	8.2	0.01	8.2	0.01	8.2	0.01
1	8.32667	0.02082	8.34	0.02	8.35333	0.02517	8.35667	0.02082	8.36667	0.02082
2	8.54	0.03	8.57	0.02	8.57333	0.02517	8.59	0.02646	8.6	0.03
3	8.74	0.02	8.83333	0.01528	8.88333	0.03215	9.05333	0.02517	9.05667	0.03055
4	8.85	0.05	8.95	0.04	9.01	0.01	9.13	0.03	9.14333	0.04041
5	8.94	0.03	9.03	0.02	9.11667	0.03055	9.23	0.03	9.24667	0.03512
6	8.96	0.03	9.06667	0.01528	9.14	0.01	9.28	0.03	9.30333	0.04041
7	8.99	0.03	9.08333	0.01528	9.15	0.01	9.3	0.01	9.31333	0.03055
8	9.03333	0.02517	9.1	0.01	9.17	0.01	9.32	0.01	9.34667	0.02517
9	9.02333	0.02517	9.08667	0.02517	9.17	0.01	9.33	0.01	9.35	0.03606
10	9.02333	0.02082	9.08333	0.03055	9.17333	0.02517	9.33667	0.02517	9.35333	0.03055
