# Supplementary material for: Regulation of inorganic carbon acquisition in a red tide alga ( Skeletonema costatum ): the importance of phosphorus availability
Source: Copernicus journal article supplement (doi:10.5194/bg-15-4871-2018), 2018-08-17
Supplement: Supplementary file [file bg-15-4871-2018-supplement-title-page.pdf › bg-15-4871-2018-supplement-title-page.pdf]

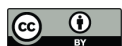

## *Supplement of*

# **Regulation of inorganic carbon acquisition in a red tide alga (*Skeletonema costatum*): the importance of phosphorus availability**

**Guang Gao et al.**

*Correspondence to:* Jianrong Xia (jrxia@gzhu.edu.cn)

- bg-15-4871-2018-supplement-title-page.pdf
- Supplement.xlsx

The copyright of individual parts of the supplement might differ from the CC BY 4.0 License.
